# Supplementary material
Source: PubMed Central journal article supplement (PMC2846197)

## Supplementary Material

### Functional Characterization of the Cyclomarin/Cyclomarazine Prenyltransferase CymD Directs the Biosynthesis of Unnatural Cyclic Peptides

Andrew W. Schultz, Chad A. Lewis, Michael R. Luzung, Phil S. Baran, and Bradley S. Moore

#### Relative yield of known and novel cyclomarin and cyclomarazine analogs

Supplementary Figures 1 and 2..... S2

#### *N*-(1,1-dimethyl-1-allyl)-tryptophan (**2**) produced synthetically, enzymatically, and via fermentation

Supplementary Figure 3. <sup>1</sup>H NMR comparison of (**2**)<sup>a</sup>..... S3

#### Structure determination of cyclomarazine P

Supplementary Figure 4. <sup>1</sup>H NMR spectrum of (**7**)..... S4

Supplementary Figure 5. HSQC spectrum of (**7**)..... S5

Supplementary Figure 6. HMBC spectrum of (**7**)..... S6

#### Structure determination of cyclomarazine M

Supplementary Figure 7. <sup>1</sup>H NMR spectrum of (**6**)..... S7

Supplementary Figure 8. HSQC spectrum of (**6**)..... S8

Supplementary Figure 9. HMBC spectrum of (**6**)..... S9

#### Structure determination of cyclomarin P

Supplementary Figure 10. <sup>1</sup>H NMR spectrum of (**12**)..... S10

Supplementary Figure 11. HSQC spectrum of (**12**)..... S11

Supplementary Figure 12. HMBC spectrum of (**12**)..... S12

#### Structure determination of cyclomarin M

Supplementary Figure 13. <sup>1</sup>H NMR spectrum of (**11**)..... S13

Supplementary Figure 14. HSQC spectrum of (**11**)..... S14

Supplementary Figure 15. HMBC spectrum of (**11**)..... S15

#### Structure determination of *N*-(1,1-dimethyl-1-allyl)-tryptophan and *N*-(1-propargyl)-tryptophan

Supplementary Figure 16. <sup>1</sup>H NMR spectrum of (**2**)<sup>a</sup>..... S16

Supplementary Figure 17. <sup>13</sup>C NMR spectrum of (**2**)..... S17

Supplementary Figure 18. <sup>1</sup>H NMR spectrum of (**15**)<sup>d</sup>..... S18

Supplementary Figure 19. <sup>13</sup>C NMR spectrum of (**15**)<sup>d</sup>..... S19

Supplementary Figure 20. <sup>1</sup>H NMR spectrum of (**4**)..... S20

Supplementary Figure 21. <sup>13</sup>C NMR spectrum of (**4**)..... S21

<sup>a</sup>all *N*-(1,1-dimethyl-1-allyl)-tryptophan and *N*-(1-propargyl)-tryptophan spectra recorded in D<sub>2</sub>O unless specified

<sup>b</sup>all cyclomarazine P and M spectra recorded in DMSO-*d*<sub>6</sub>

<sup>c</sup>all cyclomarin P and M spectra recorded in CDCl<sub>3</sub>

<sup>d</sup>recorded in CDCl<sub>3</sub>

## Relative yield of known and novel cyclomarzin and cyclomarazine analogs

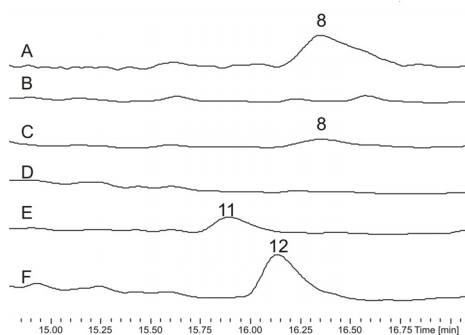

**Supplementary Figure 1.** Analysis of relative yield of cyclomarzin analogs in *Salinispora arenicola* CNS-205 wild type and *cymD*- mutant. Trace A: Wild type *S. arenicola* CNS-205. Trace B-F, *S. arenicola cymD* mutant. Traces C-F represent cultures supplemented with 80 mg/L tryptophan analogs. Trace C: *N*-(1,1-dimethyl-1-allyl)-tryptophan, D: tryptophan, E: *N*-(1-methyl)-tryptophan, F: *N*-(1-propargyl)-tryptophan. Chromatograms recorded at 210 nm. Note similar production levels of cyclomarzin M (**11**, trace E) and cyclomarzin P (**12**, trace F) in comparison to cyclomarzin A (**8**) in trace A and C. Desprenylcyclomarzin C (**10**, RT=15.2 min) is produced at levels below the detection limit of this analysis in the *cymD* mutant (trace B), and did not increase to a detectable level with the addition of tryptophan (trace D).

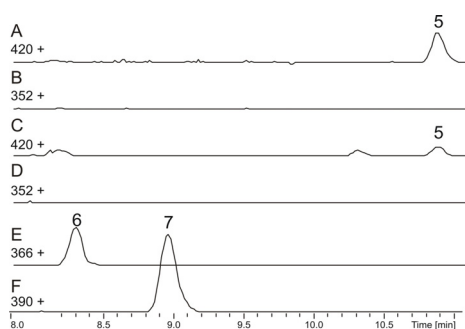

**Supplementary Figure 2** Analysis of production levels of cyclomarazine analogs in *Salinispora arenicola* CNS-205 wild type and *cymD*- mutant. Trace A: Wild type *S. arenicola* CNS-205. Trace B-F, *S. arenicola cymD* mutant. Traces C-F represent cultures supplemented with 80 mg/L tryptophan analogs. Trace C: *N*-(1,1-dimethyl-1-allyl)-tryptophan, D: tryptophan, E: *N*-(1-methyl)-tryptophan, F: *N*-(1-propargyl)-tryptophan. Chromatograms represent the ESI-MS extracted ion for the  $[M+Na]^+$  species as labeled. Note similar production levels of cyclomarazine M (**6**, trace E) and cyclomarazine P (**7**, trace F) in comparison to cyclomarazine A (**5**) in trace A and C. Production of desprenylcyclomarazine (expected  $[M+Na]^+ = 353$ ) in the *cymD* mutant has never been observed utilizing our assay conditions.

Supplementary Figure 3.  $^1\text{H-NMR}$  comparison of *N*-(1,1-dimethyl-1-allyl)-tryptophan (**2**)

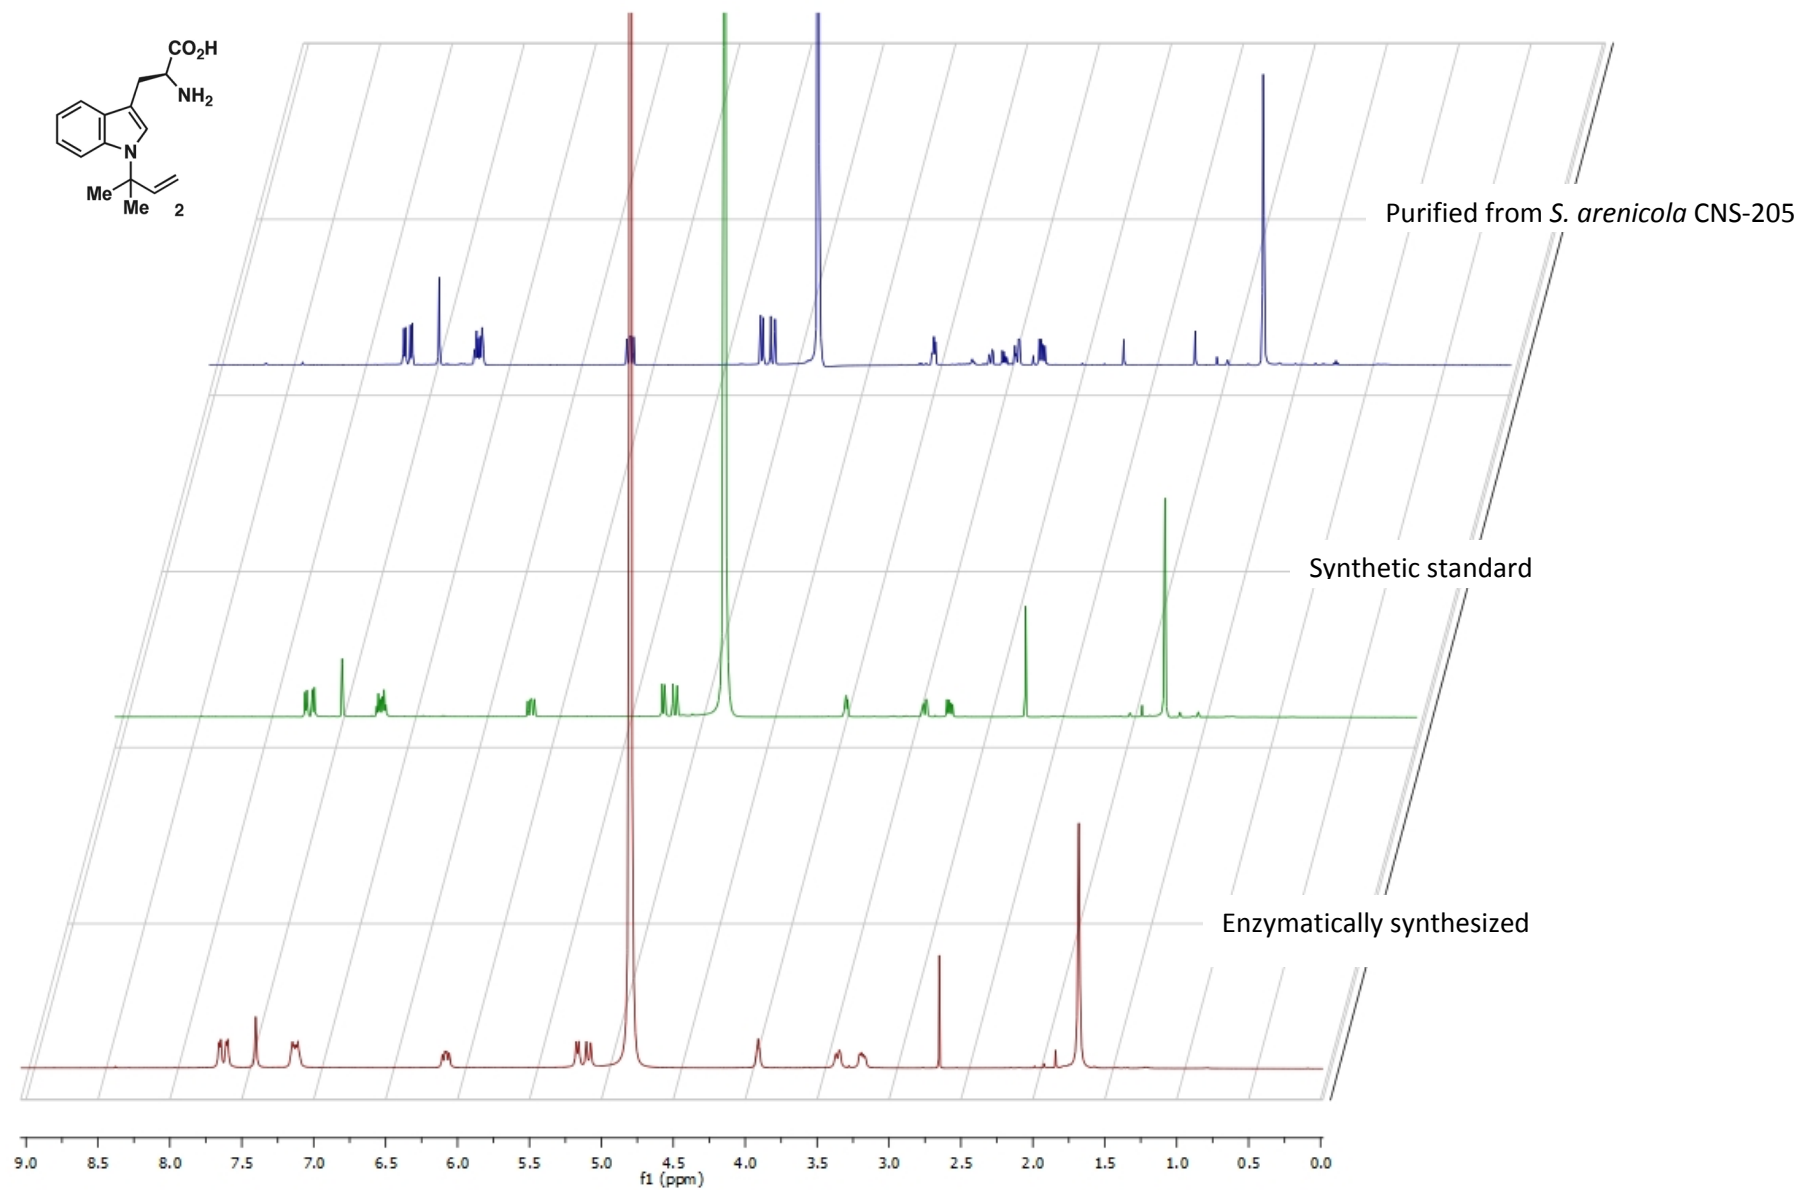

Supplementary Figure 4. <sup>1</sup>H-NMR of Cyclomarazine P (7)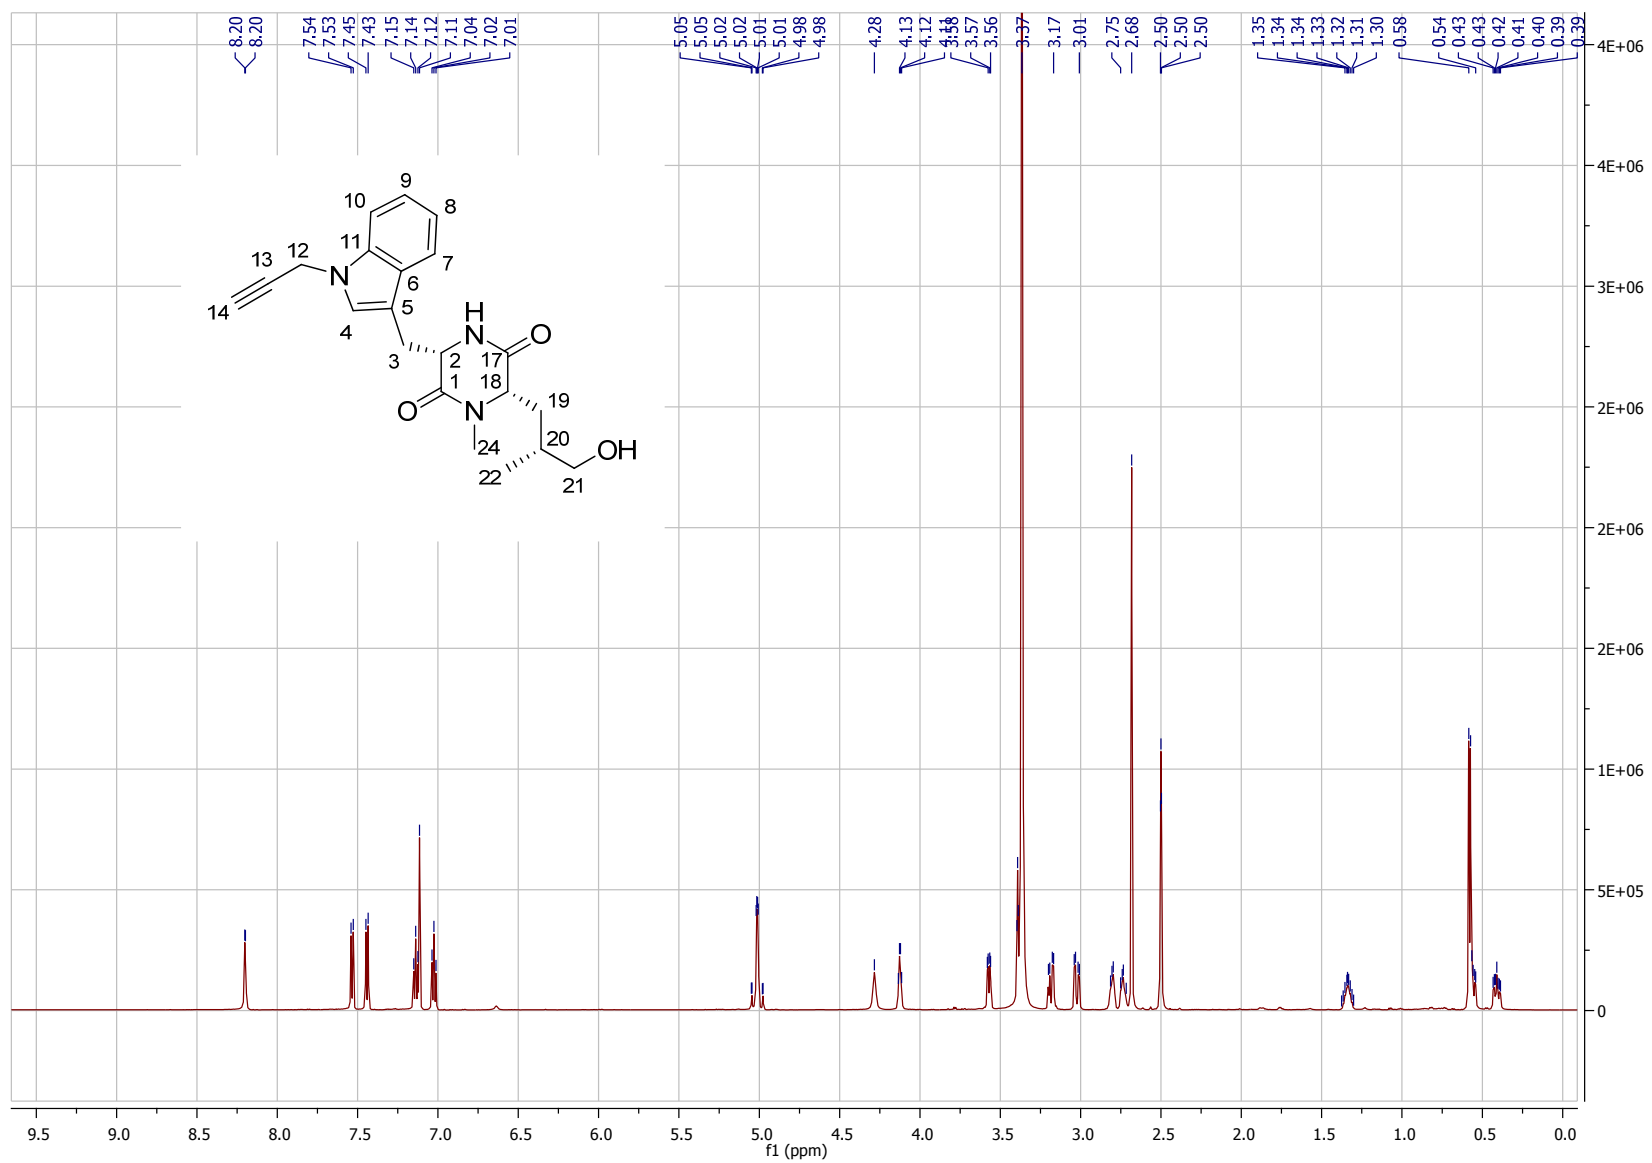

Supplementary Figure 5. HSQC NMR of Cyclomarazine P (7)

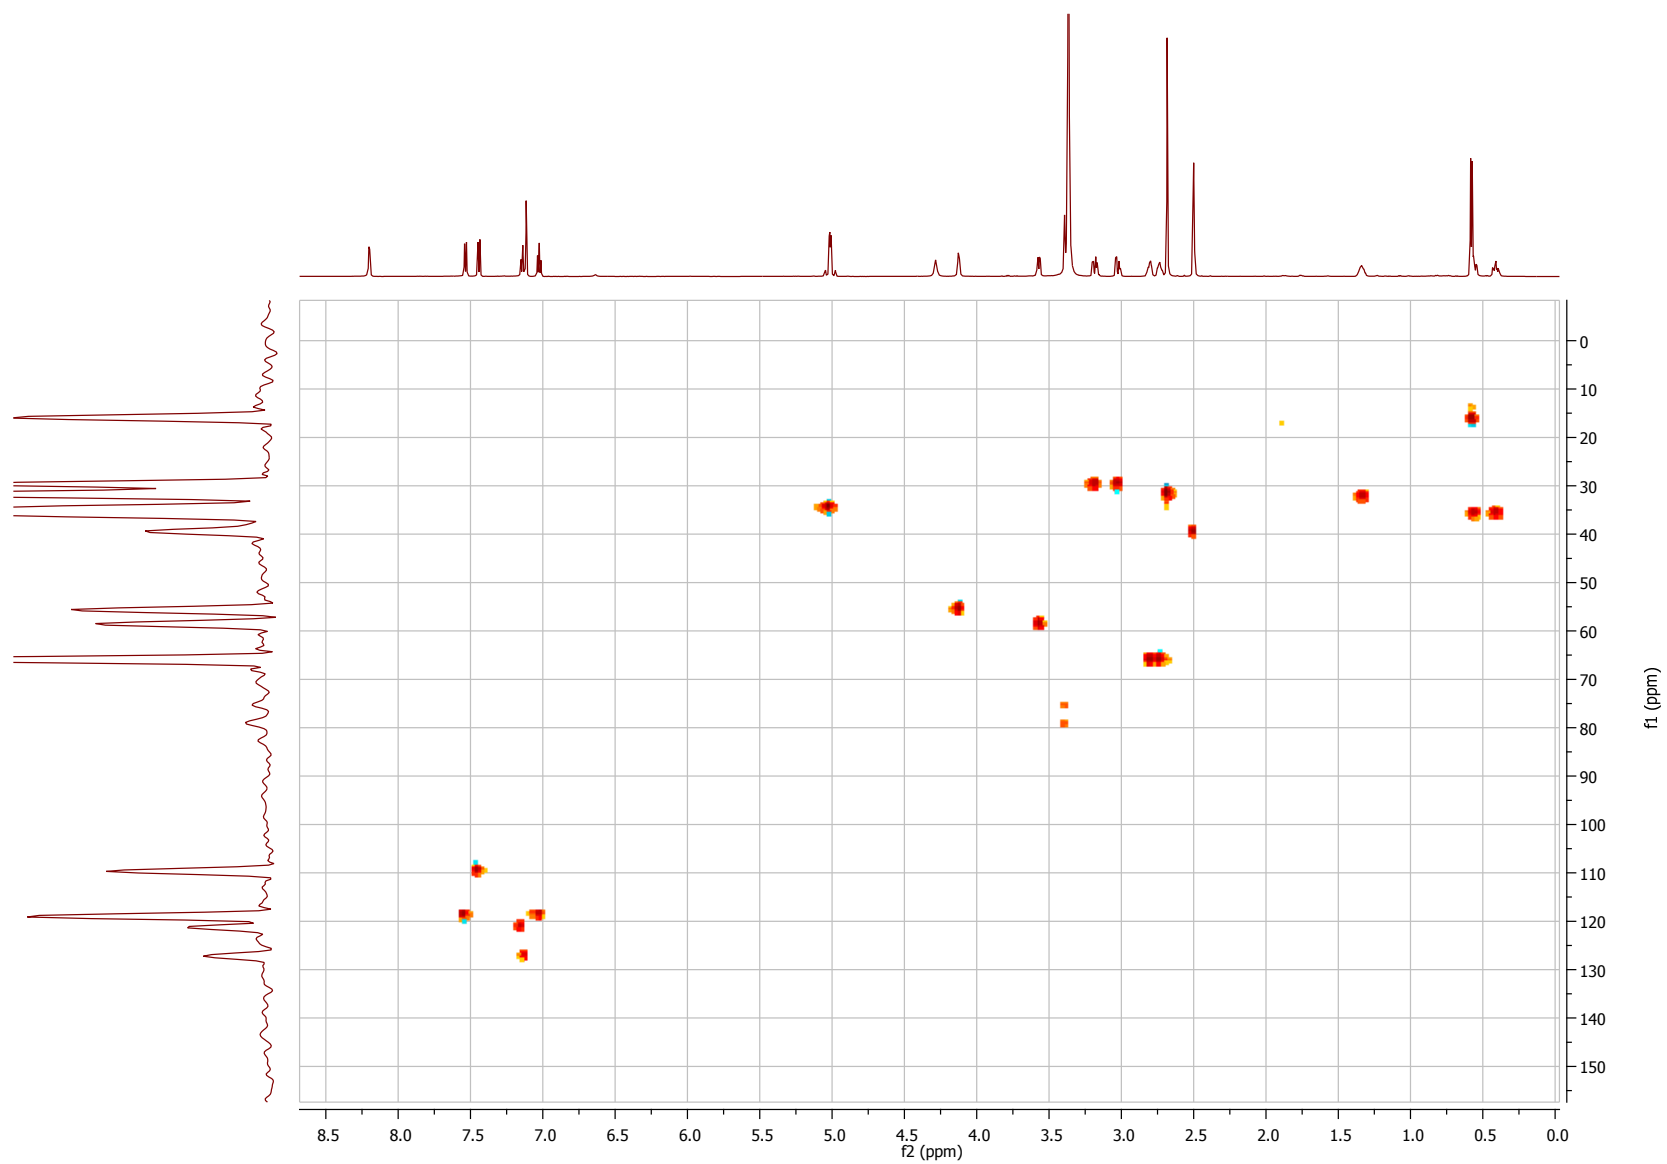

Supplementary Figure 6. HMBC NMR of Cyclomarazine P (7)

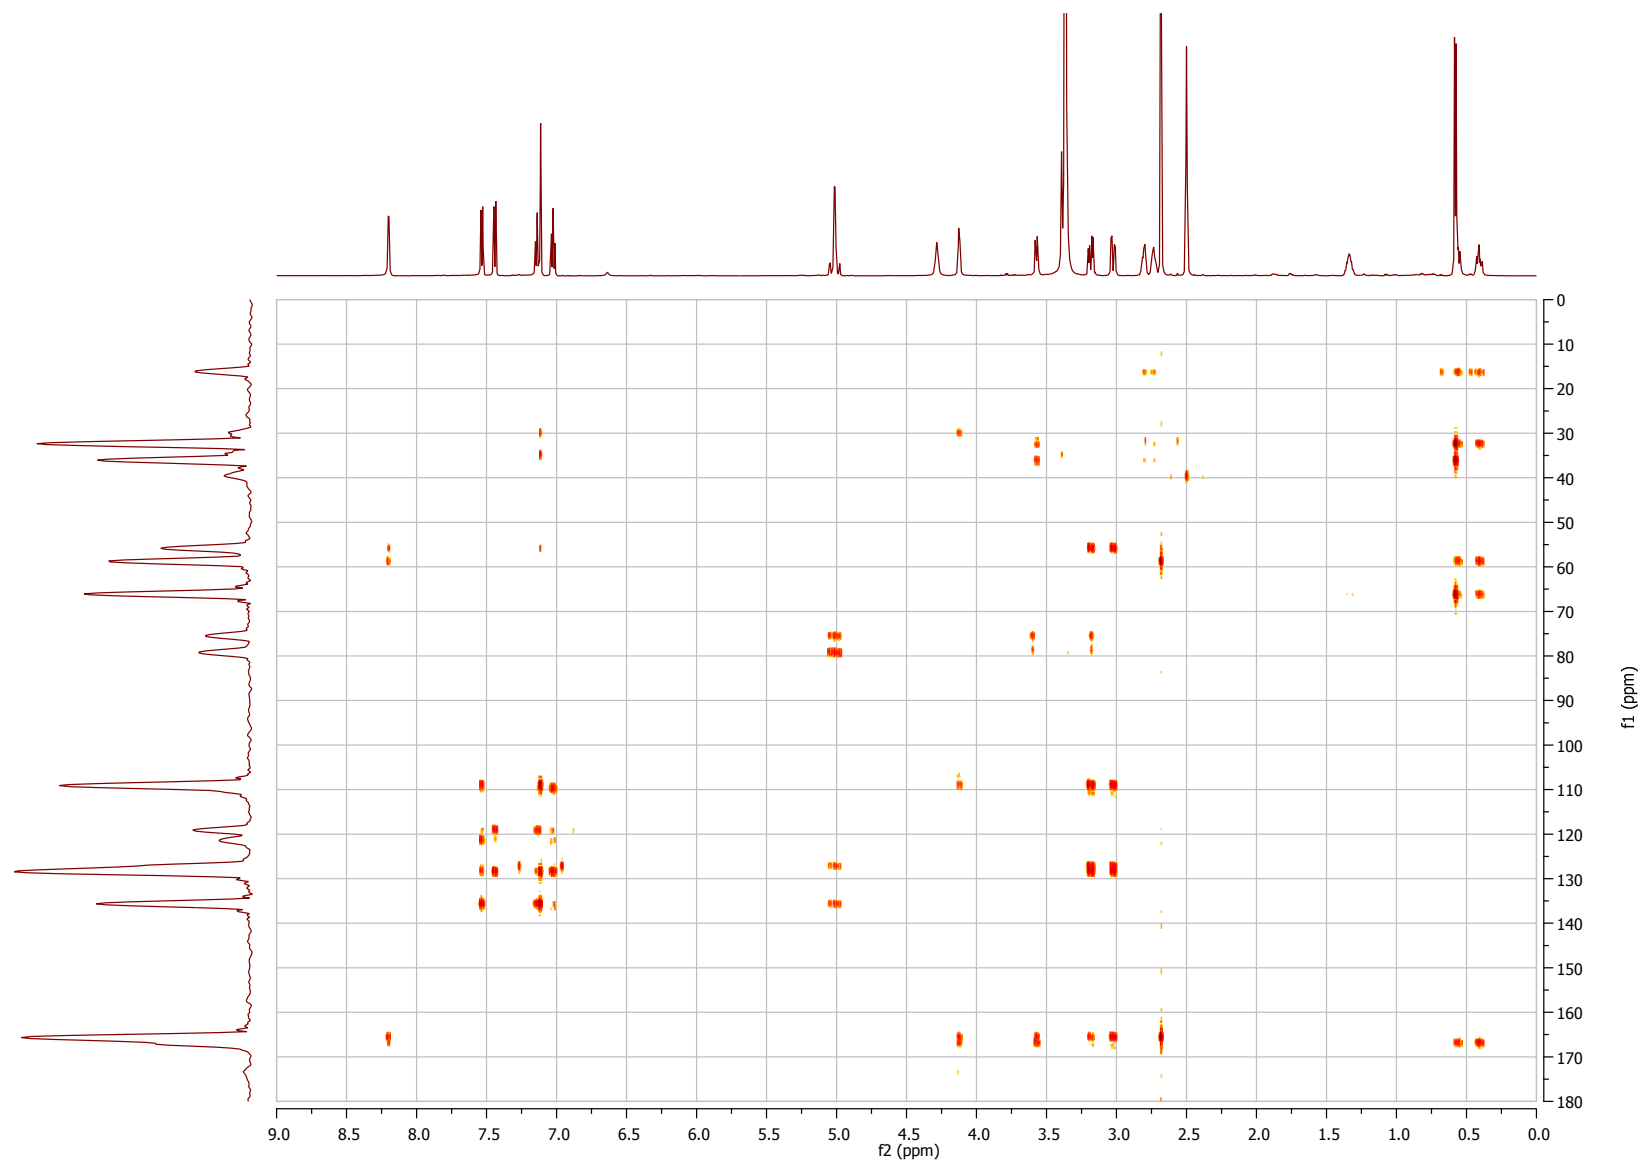

Supplementary Figure 7.  $^1\text{H-NMR}$  of Cyclomarazine M (6)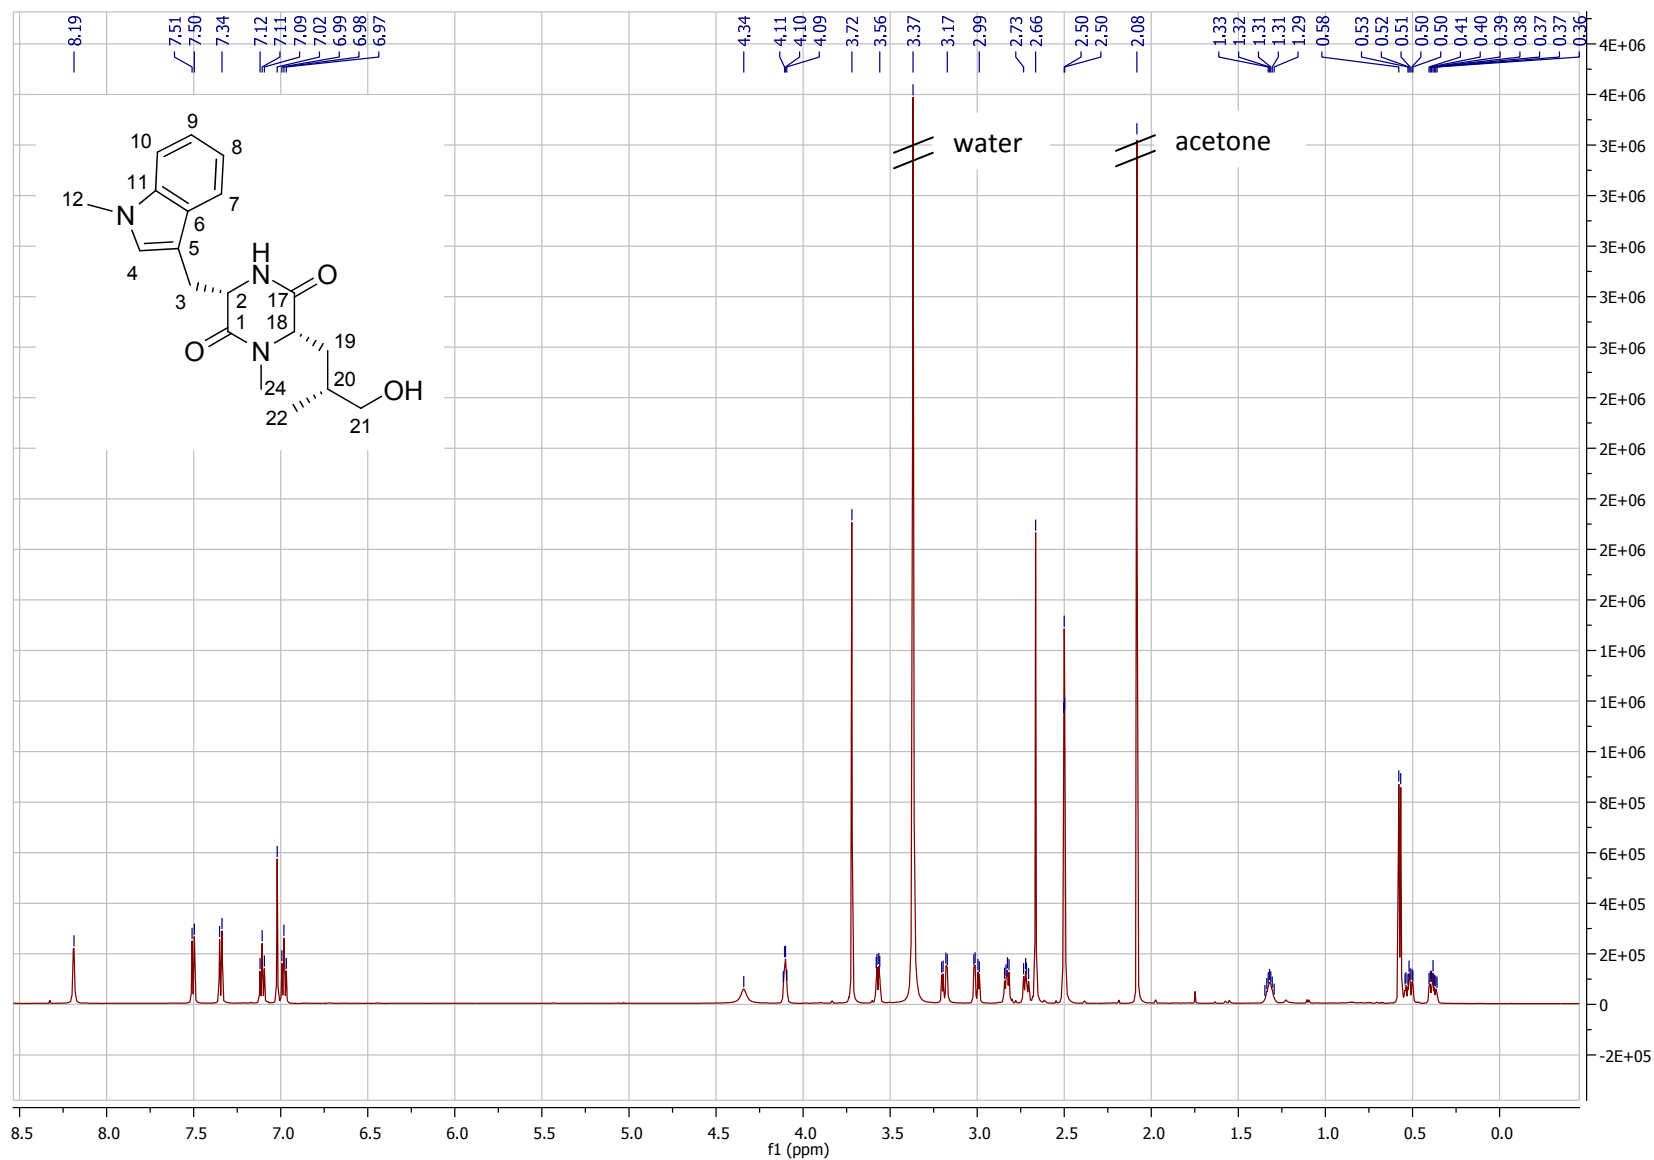

Supplementary Figure 8. HSQC NMR of Cyclomarazine M (6)

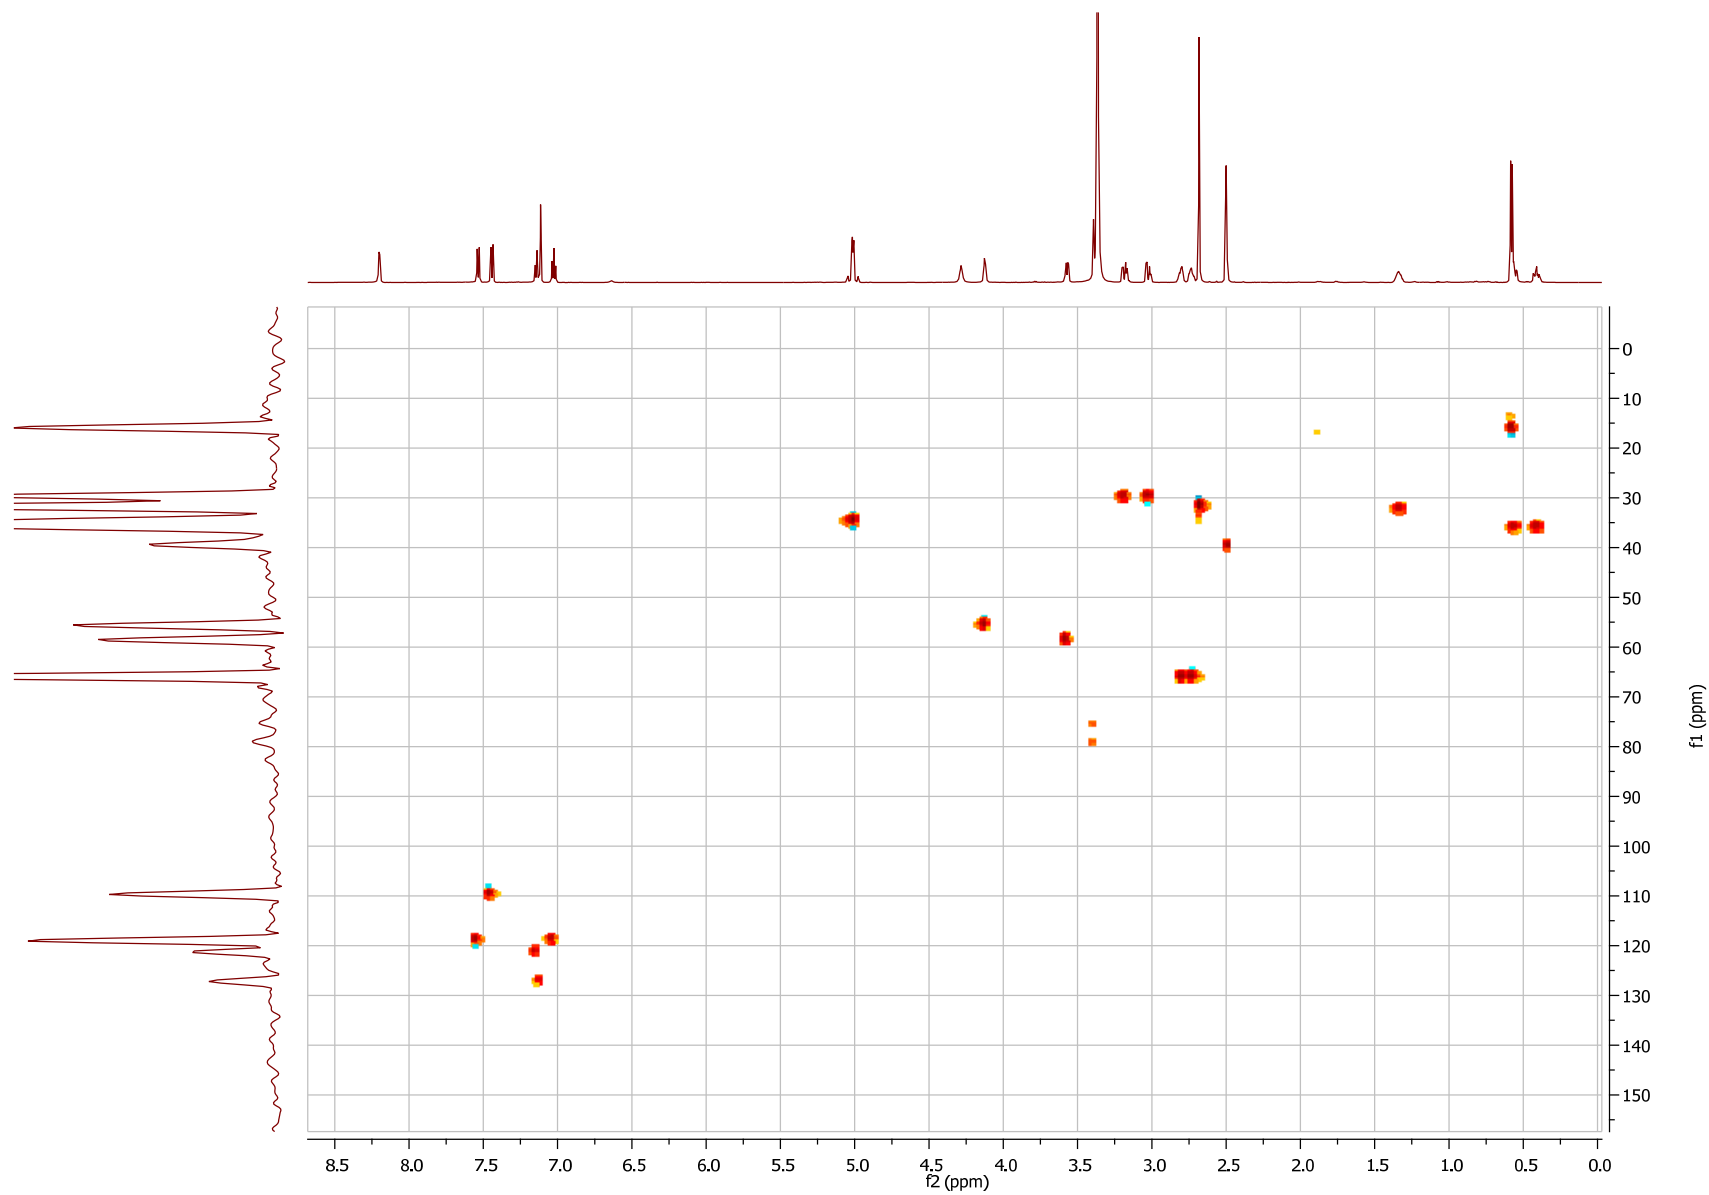



Supplementary Figure 9. HMBC NMR of Cyclomarazine M (6)

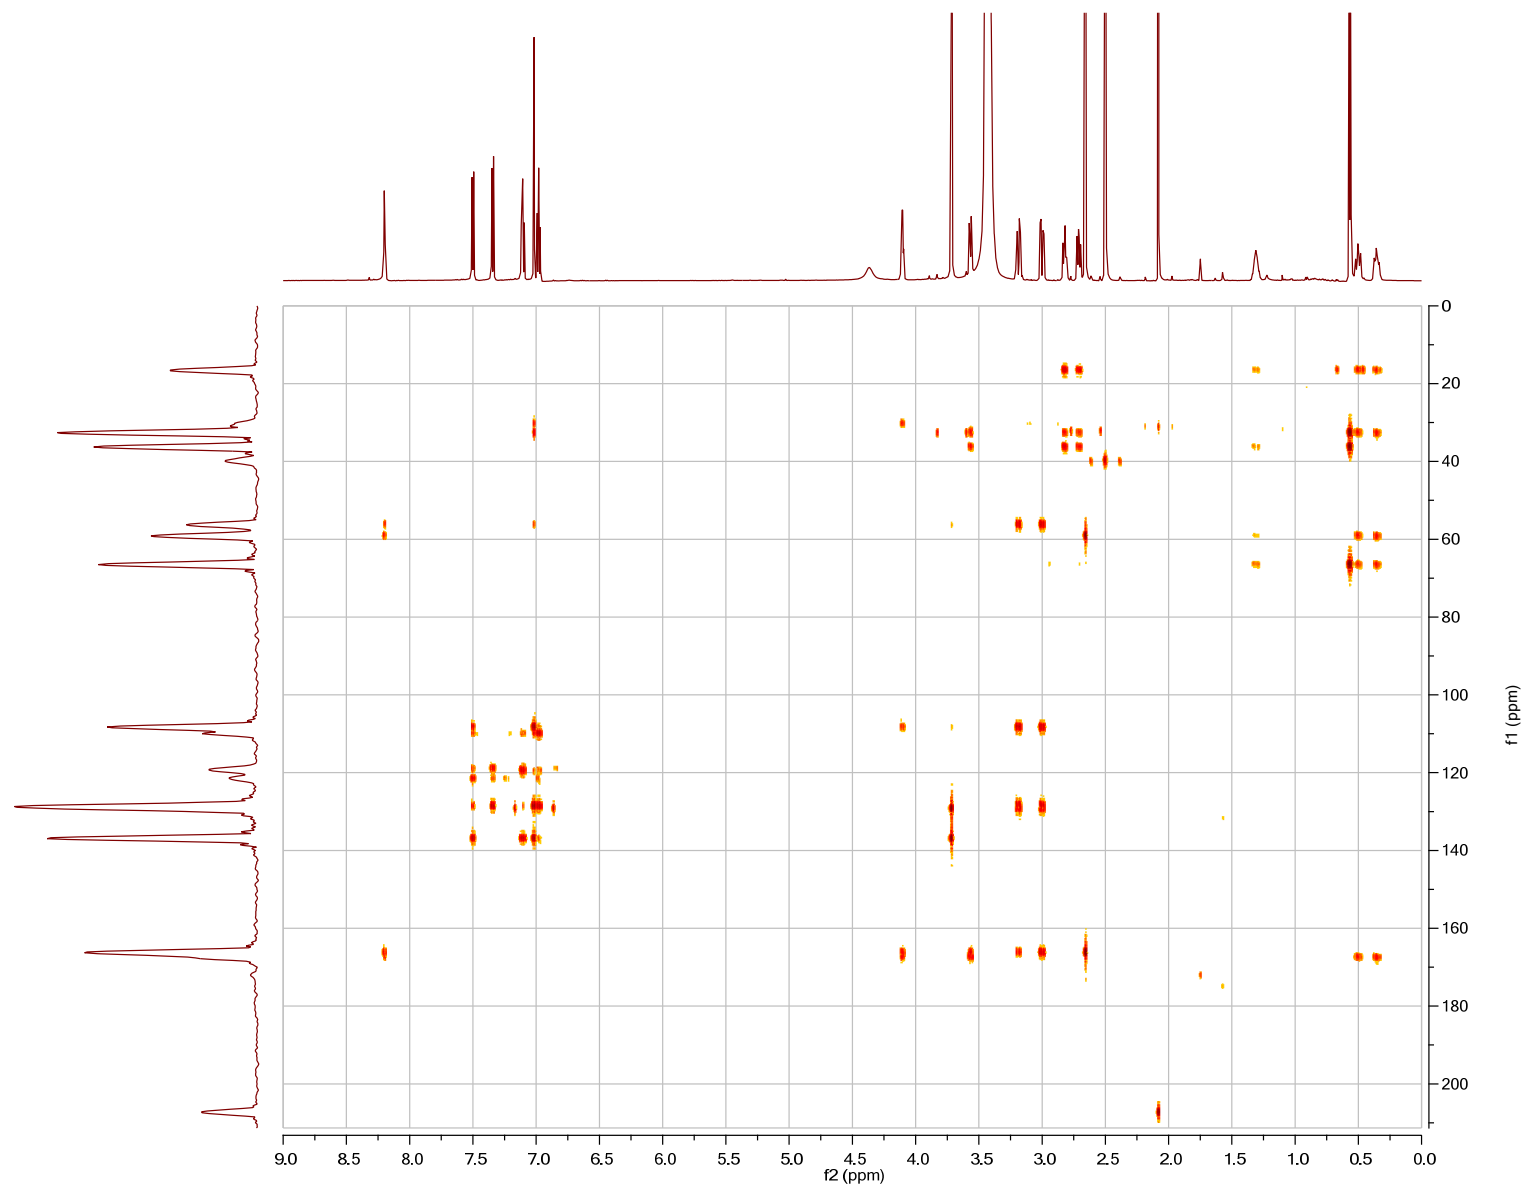

Supplementary Figure 10. <sup>1</sup>H-NMR of Cyclomarín P (12)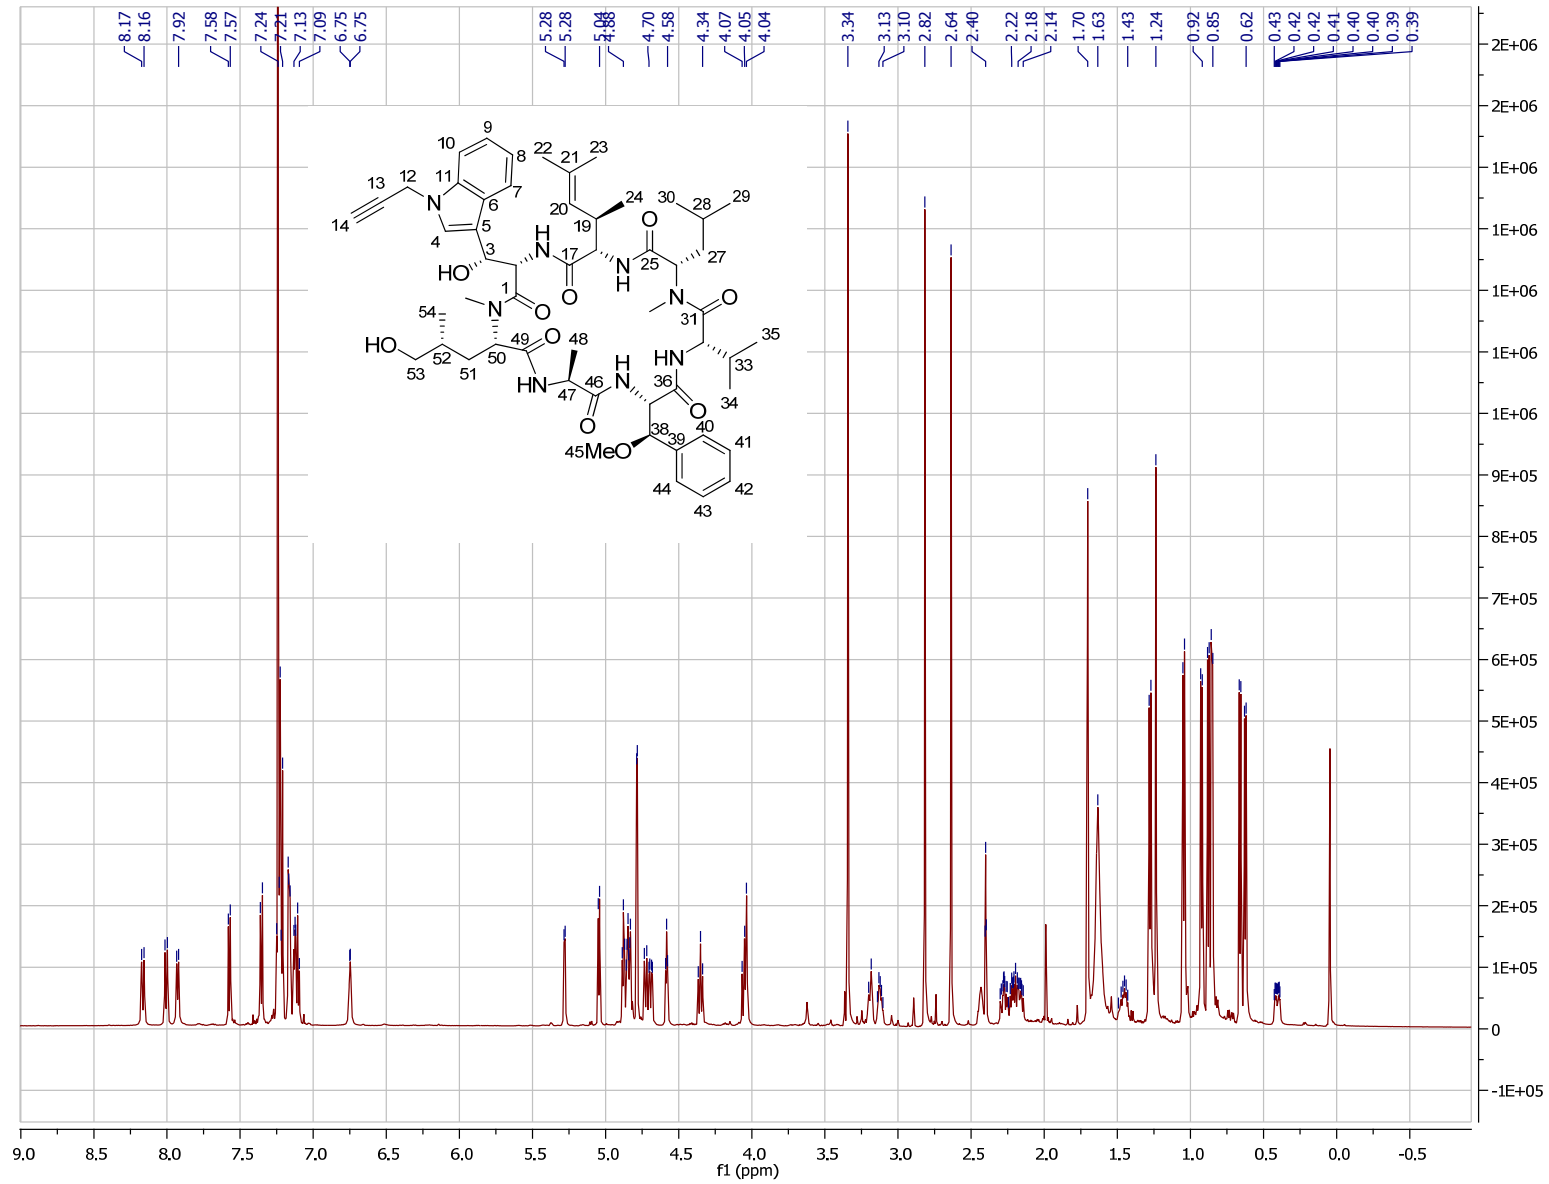

Supplementary Figure 11. HSQC NMR of Cyclomarin P (12)

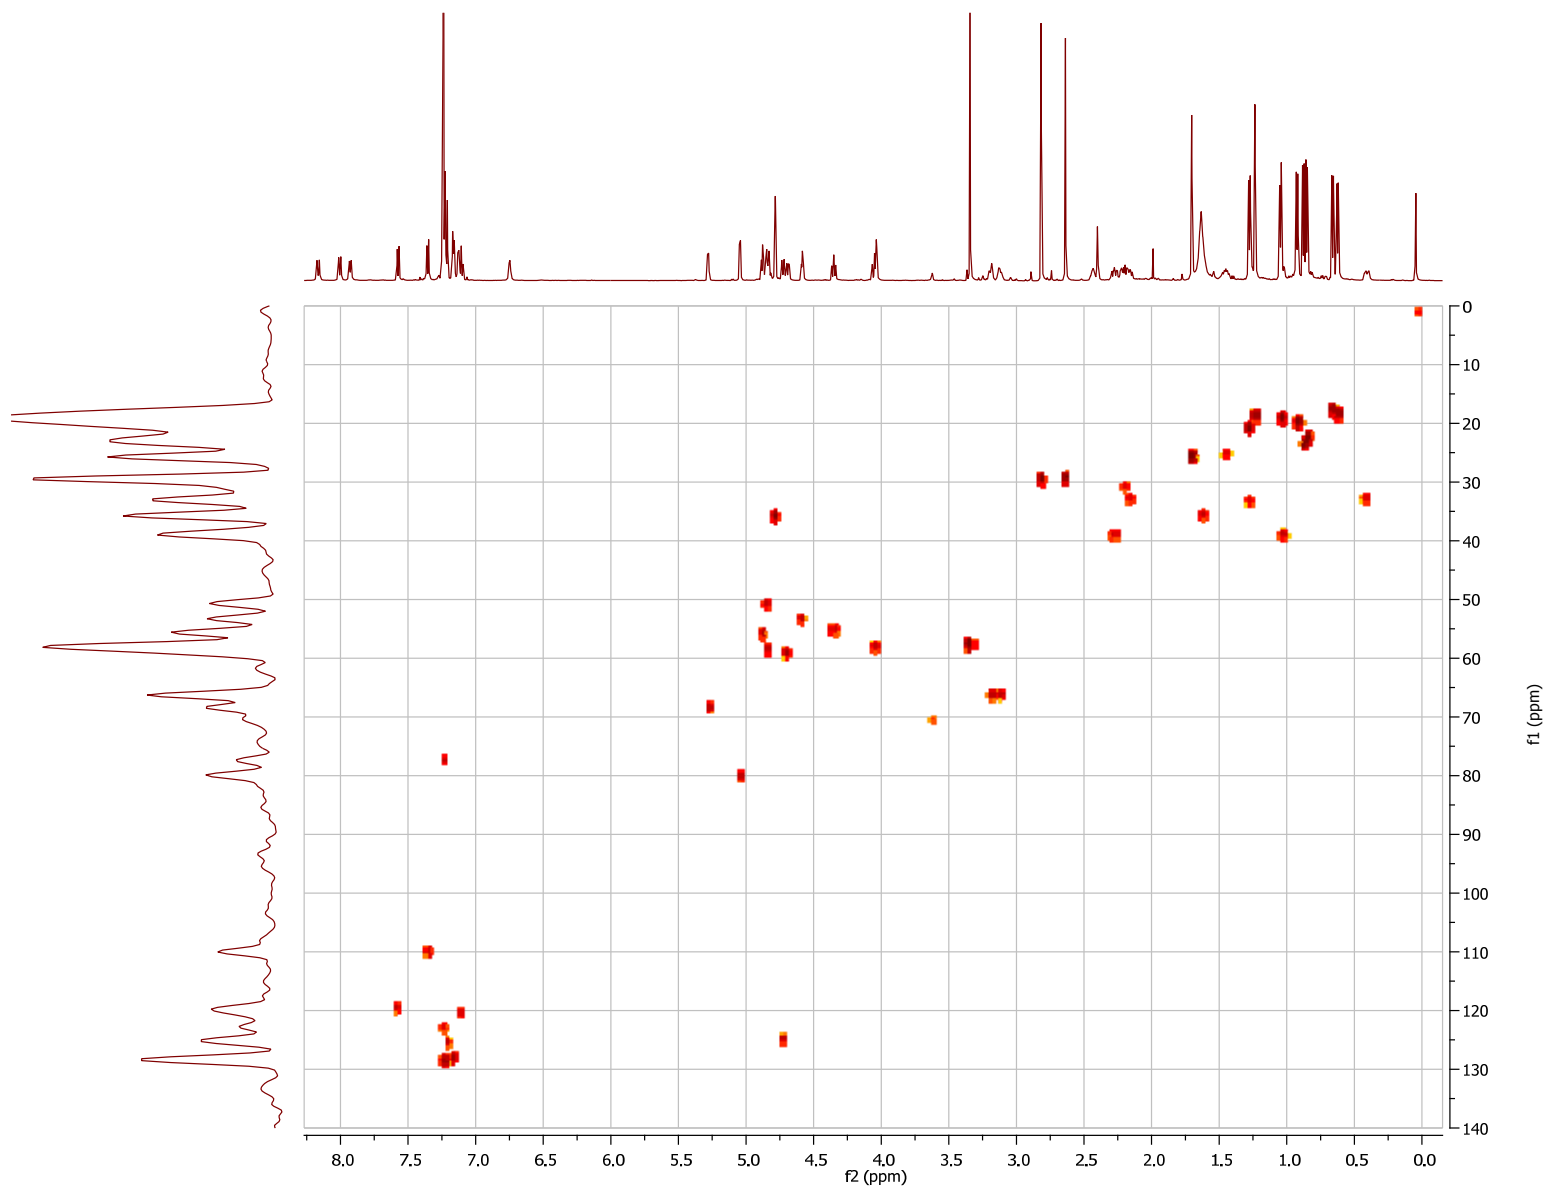

Supplementary Figure 12. HMBC NMR of Cyclomarin P (12)

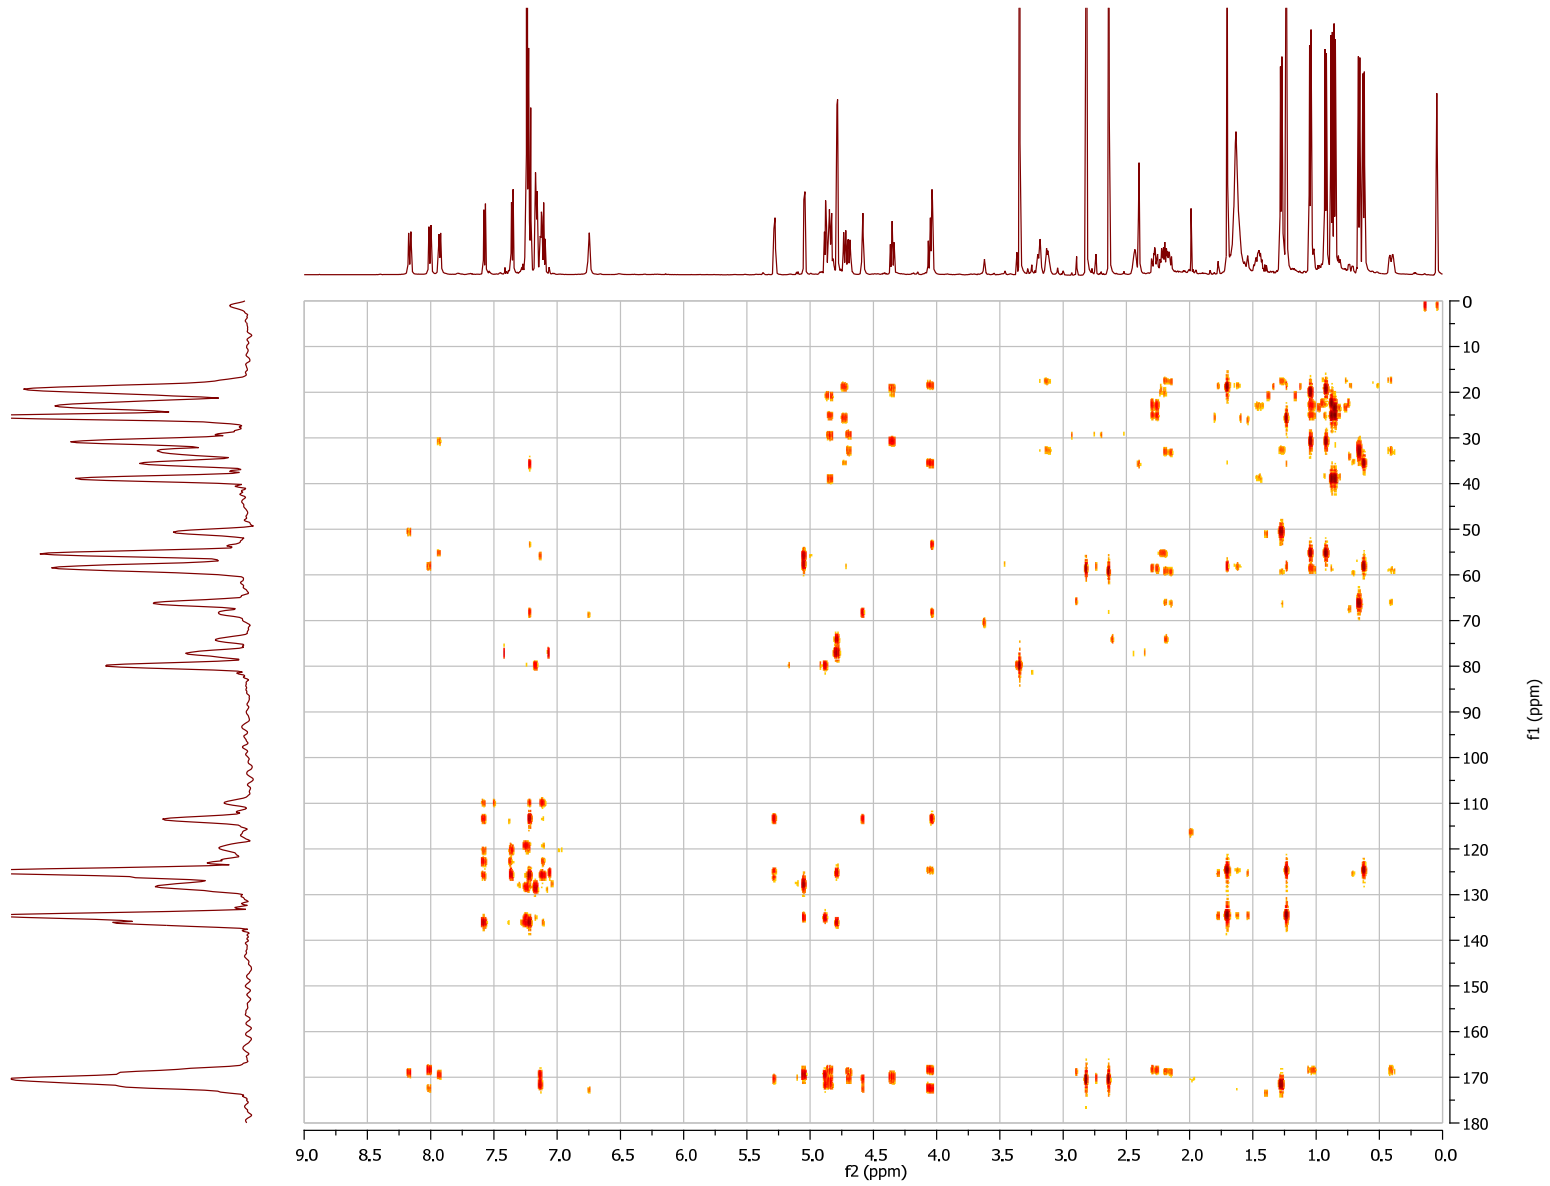

Supplementary Figure 13. <sup>1</sup>H-NMR of Cyclomarín M (11)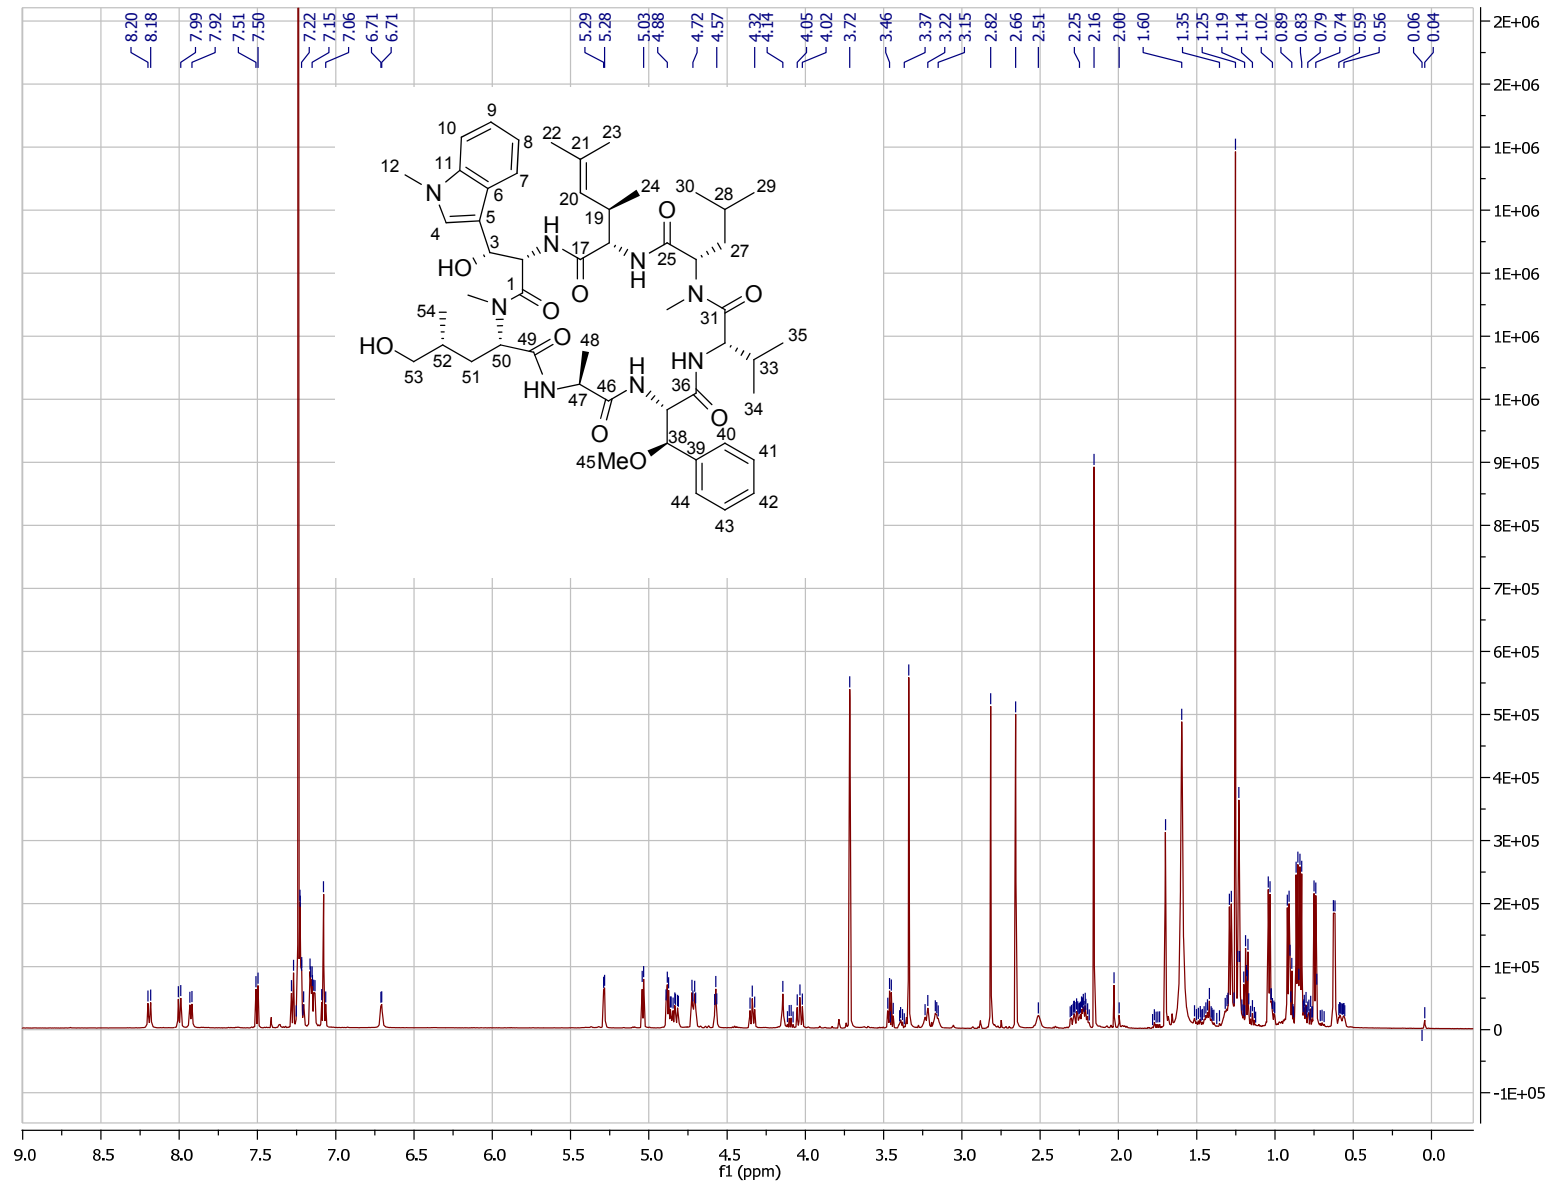

Supplementary Figure 14. HSQC NMR of Cyclomarín M (11)

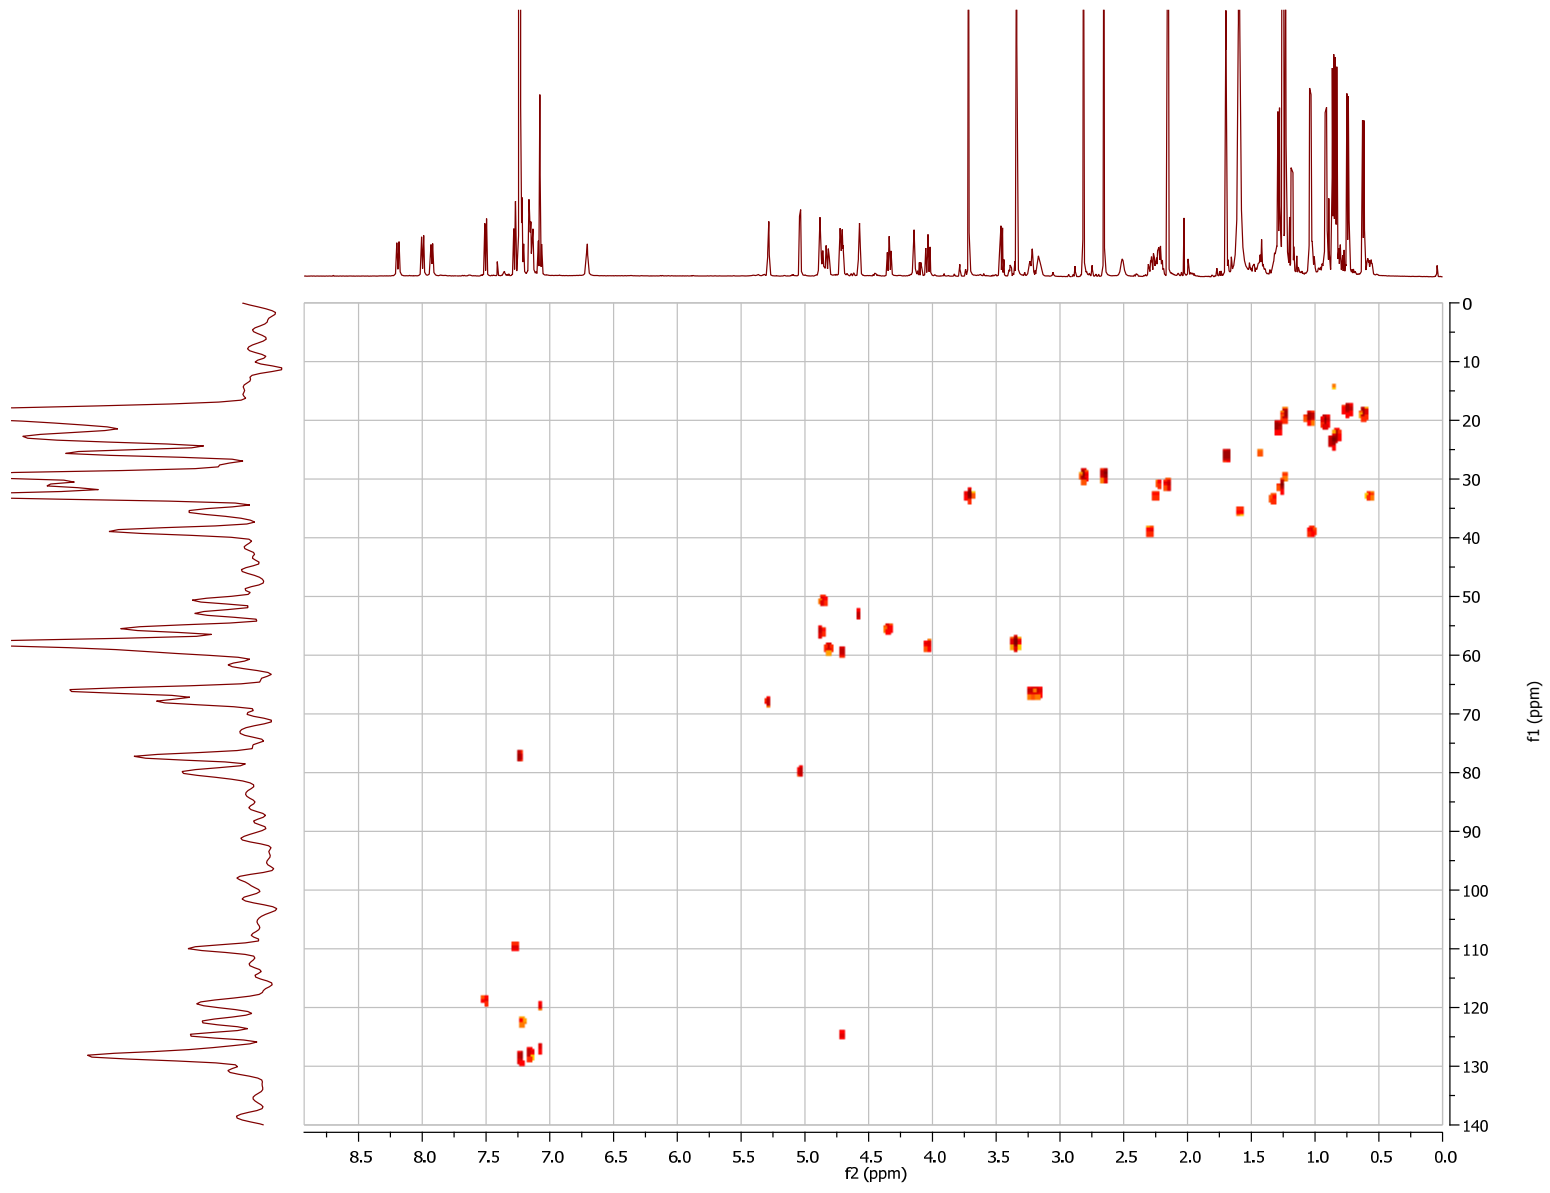

Supplementary Figure 15. HMBC NMR of Cyclomarín M (11)

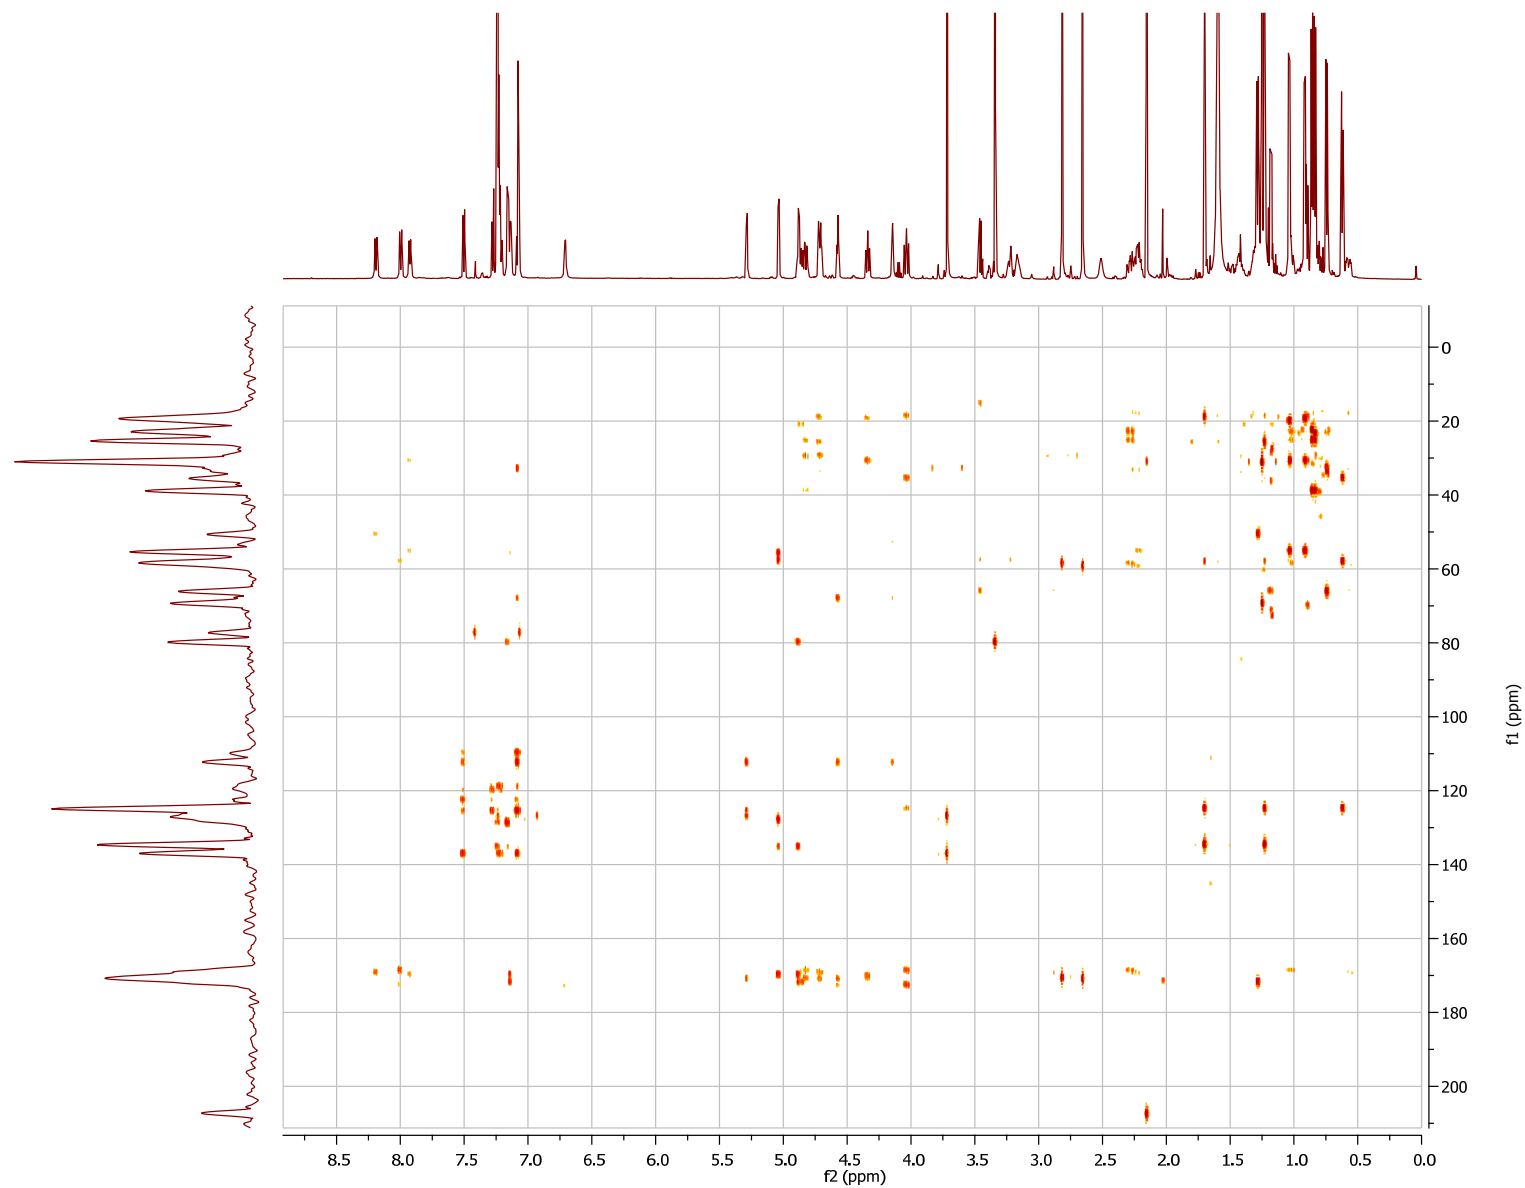

Supplementary Figure 16.  $^1\text{H}$  NMR spectrum of (2)

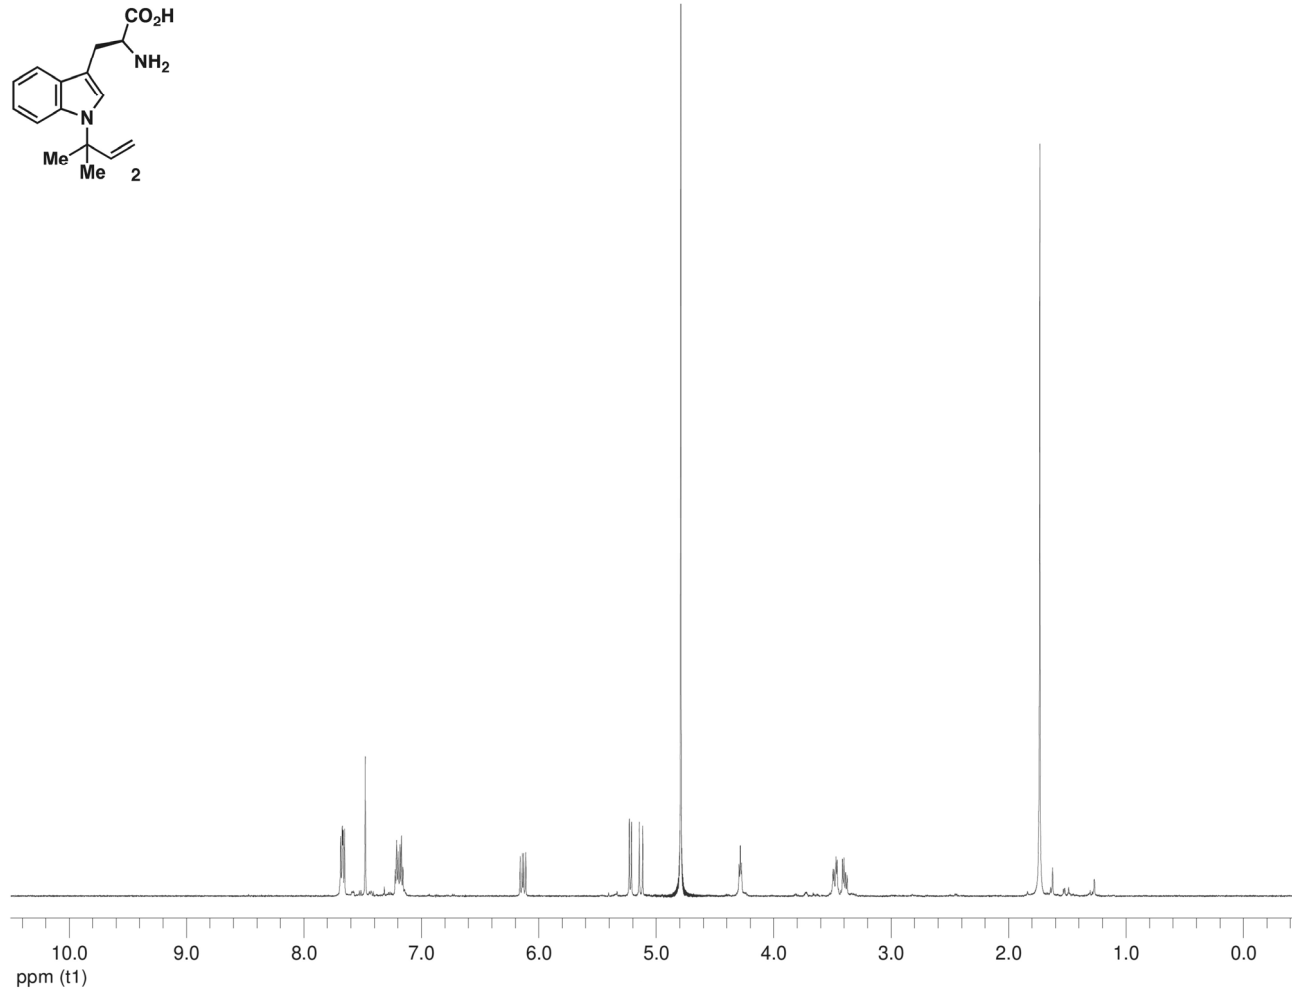



Supplementary Figure 17.  $^{13}\text{C}$  NMR spectrum of (2)

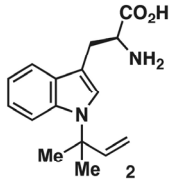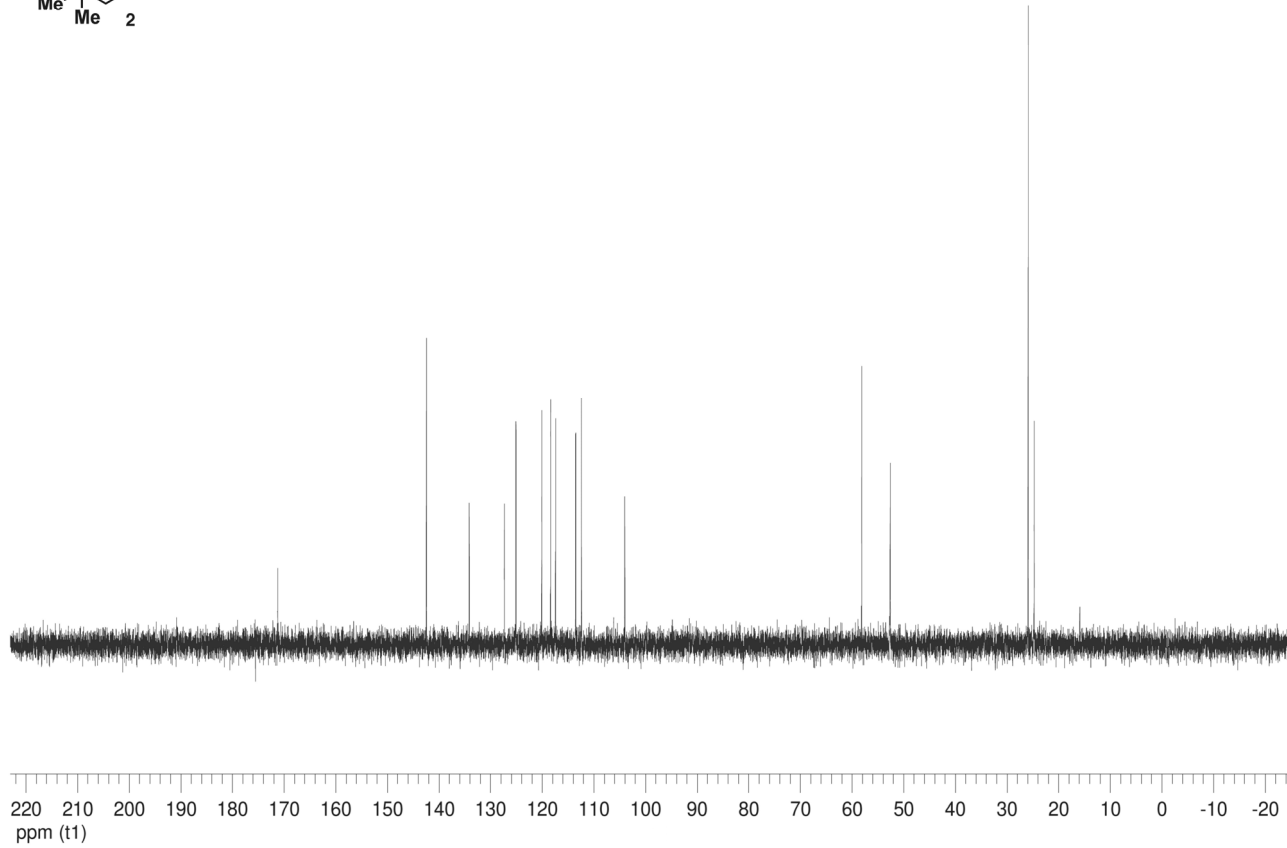

Supplementary Figure 18.  $^1\text{H}$  NMR spectrum of (15)

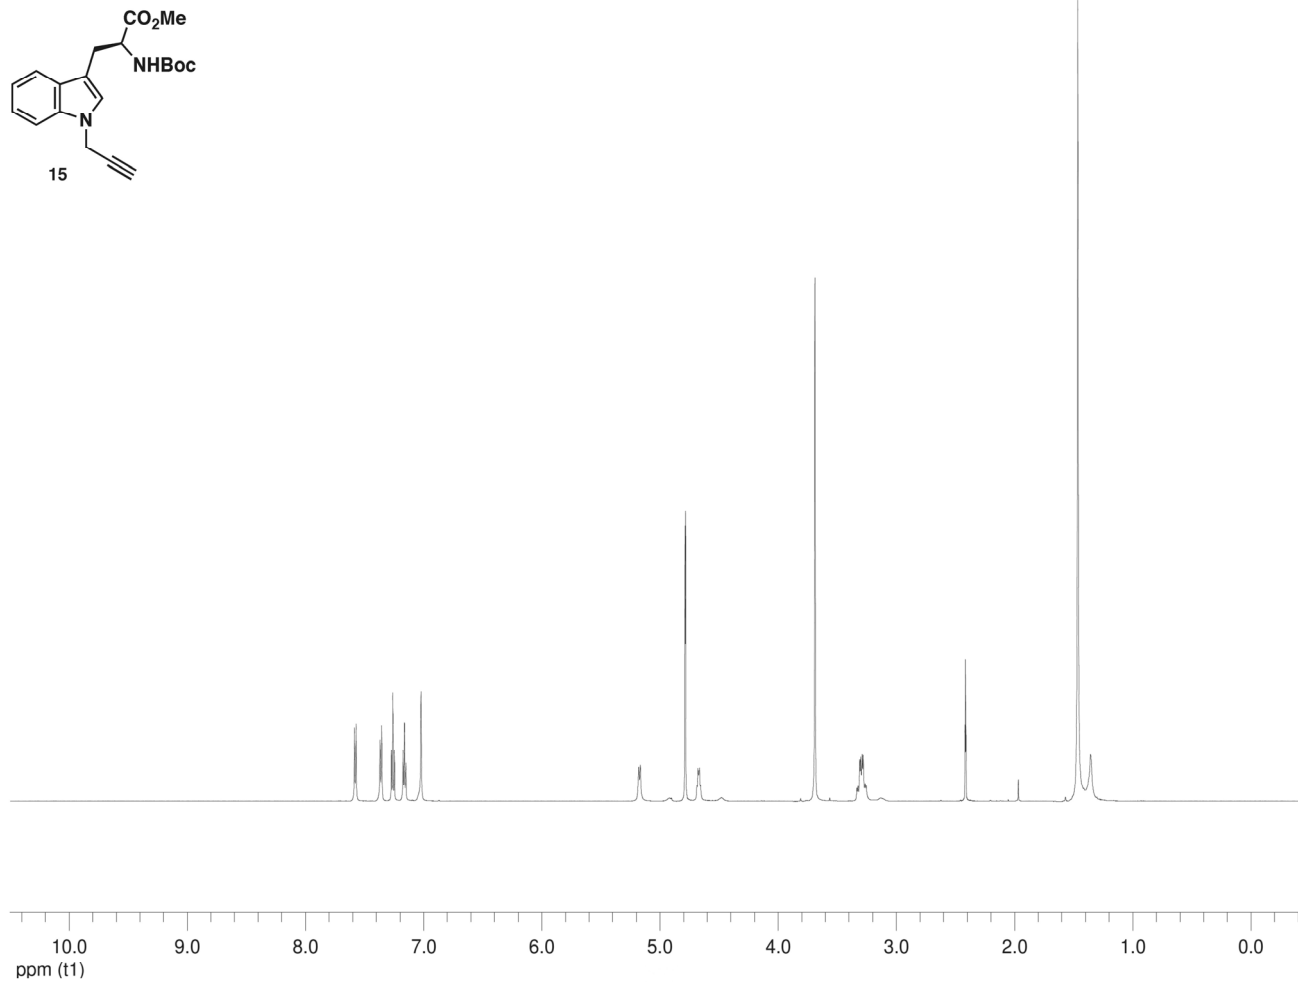

Supplementary Figure 19.  $^{13}\text{C}$  NMR spectrum of (15)

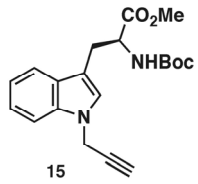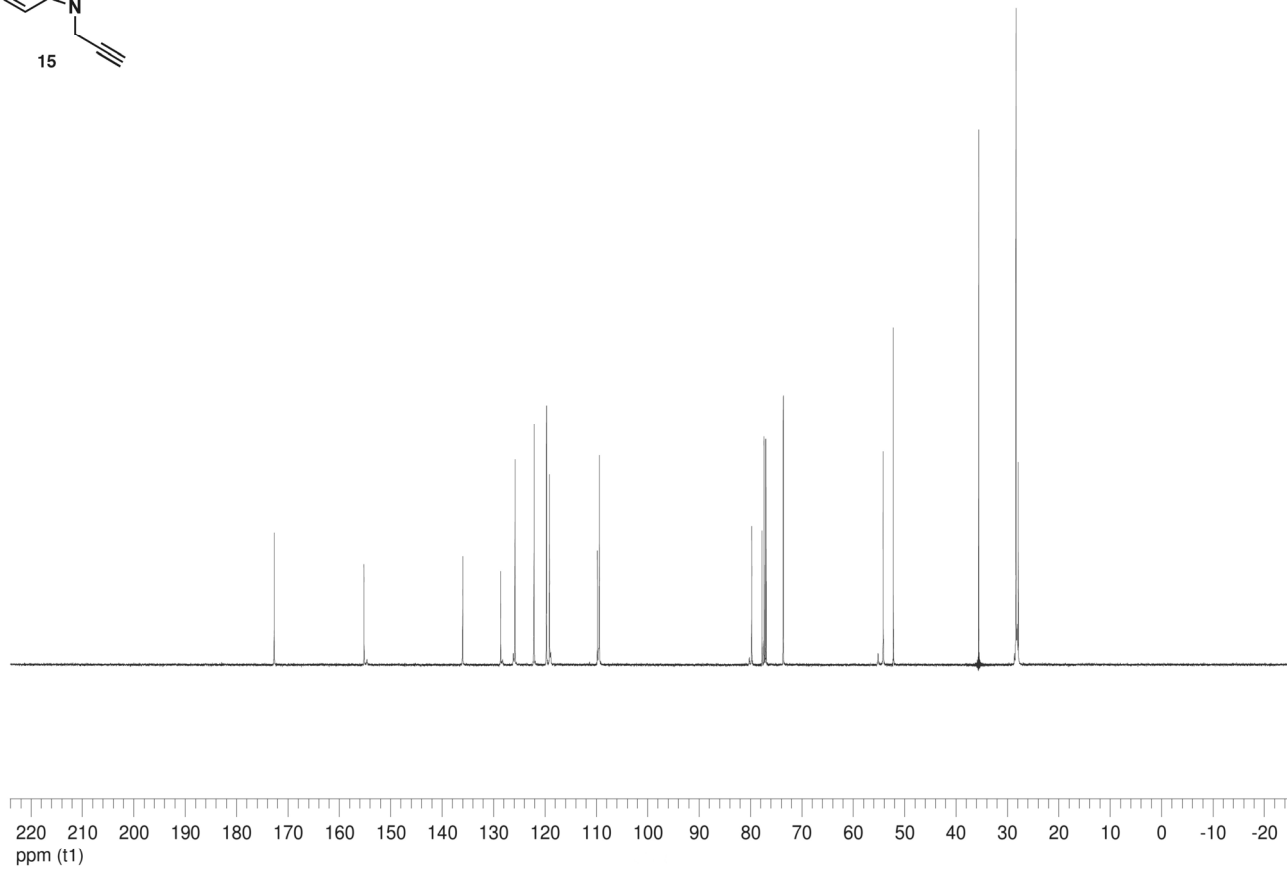

Supplementary Figure 20.  $^1\text{H}$  NMR spectrum of (4)

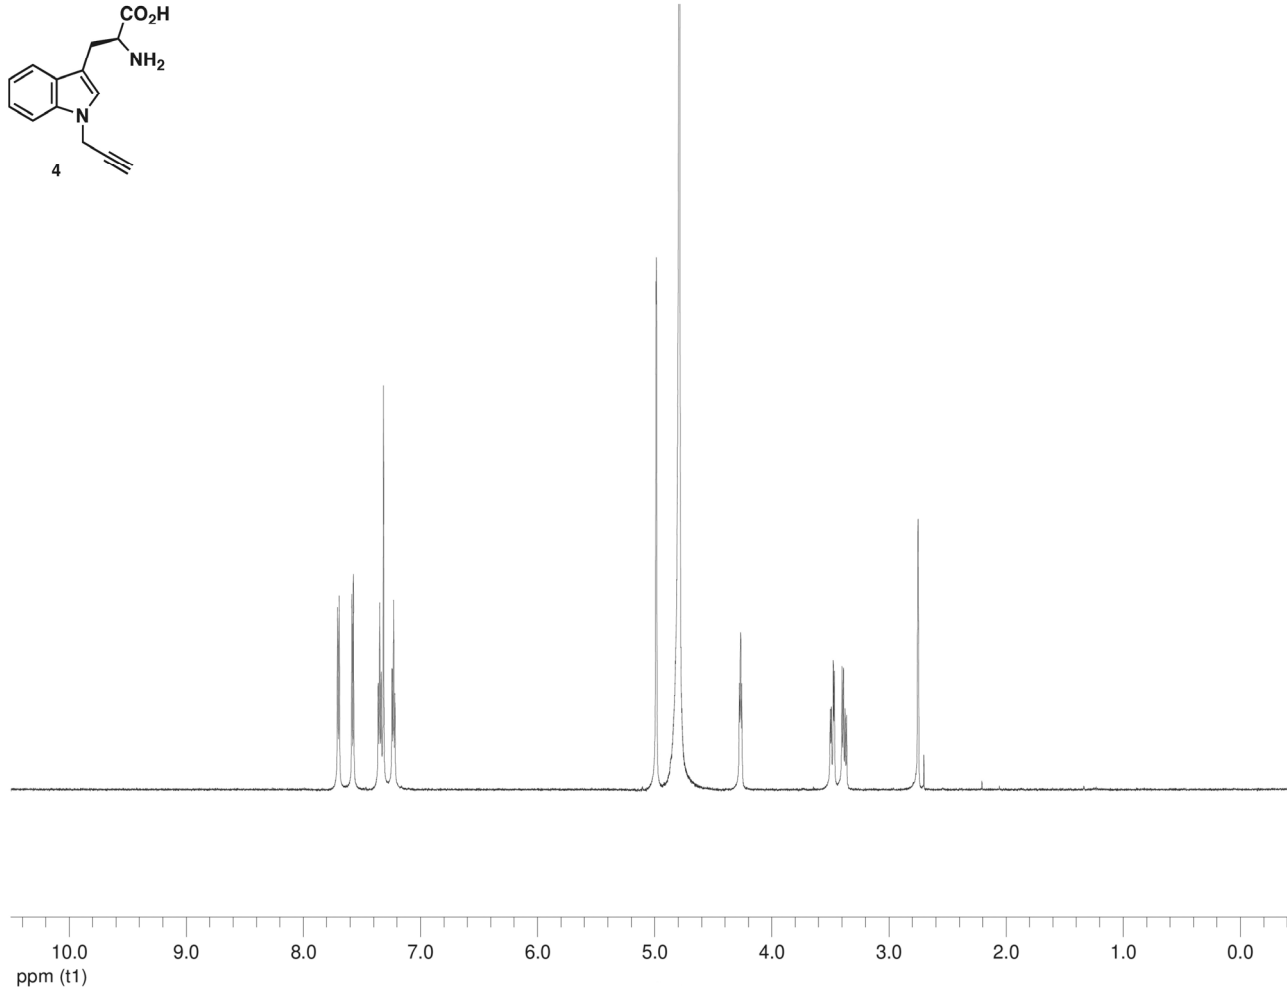

Supplementary Figure 21.  $^{13}\text{C}$  NMR spectrum of (4)

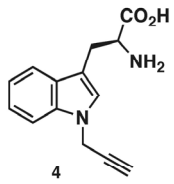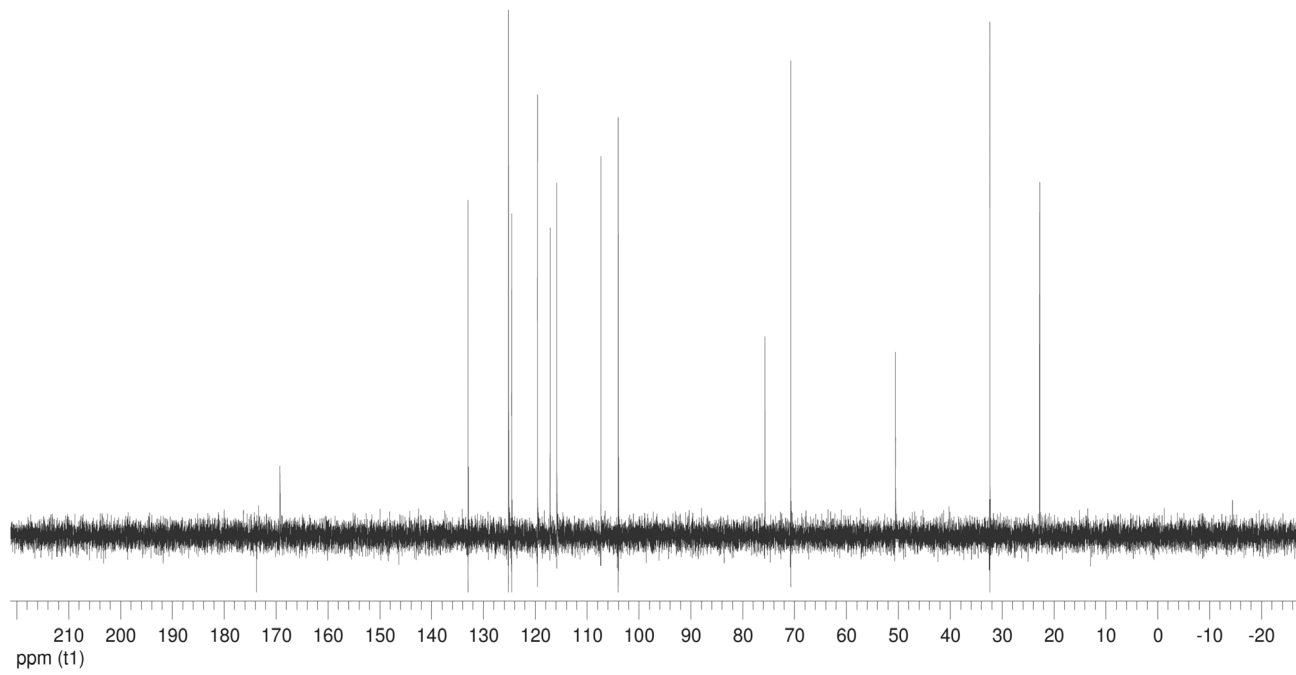

Supplement: NIHMS169374-supplement-1_si_001.pdf [file NIHMS169374-supplement-1_si_001.pdf]
